# Supplementary material for: Genomic Epidemiology of Salmonella Infantis in Ecuador: From Poultry Farms to Human Infections
Source: PubMed Central journal article supplement (PMC7550756; doi:10.3389/fvets.2020.547891), 2020-09-29
Supplement: Image_1.pdf [file Image_1.pdf]

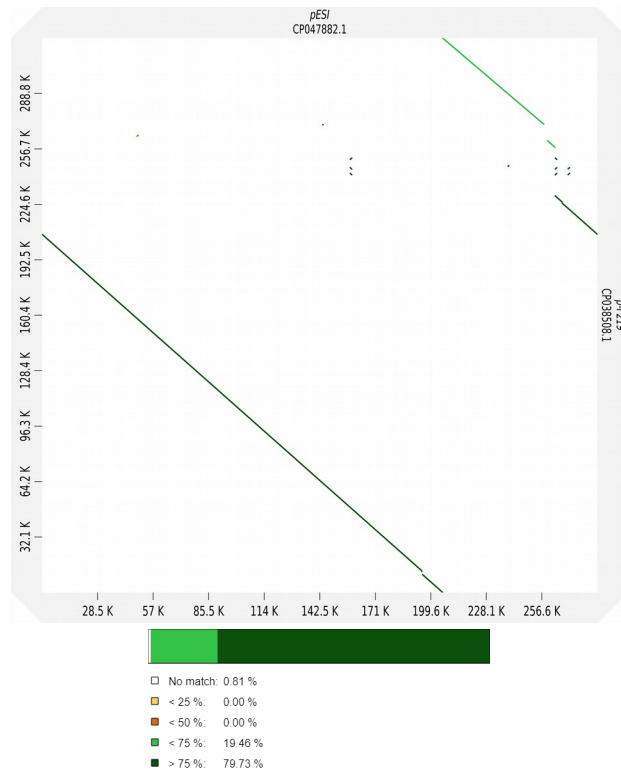

Supplementary Figure 1. Dot Plot of genome comparison of pESI and p-F219 plasmids obtained with D-Genies aligner.
